# Supplementary material for: The Development of Selective Inhibitors of NagZ: Increased Susceptibility of Gram-Negative Bacteria to β-Lactams
Source: PubMed Central journal article supplement (PMC3920638; doi:10.1002/cbic.201300395), 2013-09-05
Supplement: cbic0014-1973-sd1.pdf [file cbic0014-1973-sd1.pdf]

# CHEMBIOCHEM

## Supporting Information

© Copyright Wiley-VCH Verlag GmbH & Co. KGaA, 69451 Weinheim, 2013

### **The Development of Selective Inhibitors of NagZ: Increased Susceptibility of Gram-Negative Bacteria to $\beta$ - Lactams**

Keith A. Stubbs,<sup>\*[a]</sup> John-Paul Bacik,<sup>[b, d]</sup> G. Evan Perley-Robertson,<sup>[c]</sup> Garrett E. Whitworth,<sup>[c, e]</sup>  
Tracey M. Gloster,<sup>[c, f]</sup> David J. Vocadlo,<sup>[c]</sup> and Brian L. Mark<sup>\*[b]</sup>

cbic\_201300395\_sm\_miscellaneous\_information.pdf

**Table S1: Crystallographic data and model refinement**

| <b>StNagZ-21<br/>(PDB:4HZM)</b>        |                                                                              |
|----------------------------------------|------------------------------------------------------------------------------|
| <b>Data Collection<sup>a</sup></b>     |                                                                              |
| Space group                            | P1 2 <sub>1</sub> 1                                                          |
| Unit cell (Å)                          | a=49.77, b=66.19, c=95.07<br>$\alpha = 90, \beta = 99.21, \gamma = 90^\circ$ |
| Wavelength (Å)                         | 0.9795                                                                       |
| Resolution range (Å)                   | 49.12 – 1.45 (1.53 – 1.45)                                                   |
| Total observations                     | 378412                                                                       |
| Total unique observations              | 105765                                                                       |
| I/ $\sigma$ <sub>1</sub>               | 13.0 (3.1)                                                                   |
| Completeness (%)                       | 98.0 (87.5)                                                                  |
| R <sub>merge</sub>                     | 0.065 (0.365)                                                                |
| Redundancy                             | 3.6 (2.5)                                                                    |
| <b>Refinement Statistics</b>           |                                                                              |
| Resolution (Å)                         | 49.12 – 1.45                                                                 |
| Reflections (total)                    | 105697                                                                       |
| Reflections (test)                     | 3160                                                                         |
| Total atoms refined                    | 6089                                                                         |
| Solvent                                | 920                                                                          |
| R <sub>work</sub> (R <sub>free</sub> ) | 0.169 (0.193)                                                                |
| Mean B values (Å <sup>2</sup> )        | 14.5                                                                         |
| Overall                                |                                                                              |
| Bound ligand<br>(A/B subunit)          | 7.9/7.9                                                                      |
| RMSDs                                  | 0.008/1.172                                                                  |
| Bond lengths (Å) / angles (°)          |                                                                              |
| Ramachandran plot                      | 97.1/2.9                                                                     |
| Favored/allowed (%)                    |                                                                              |

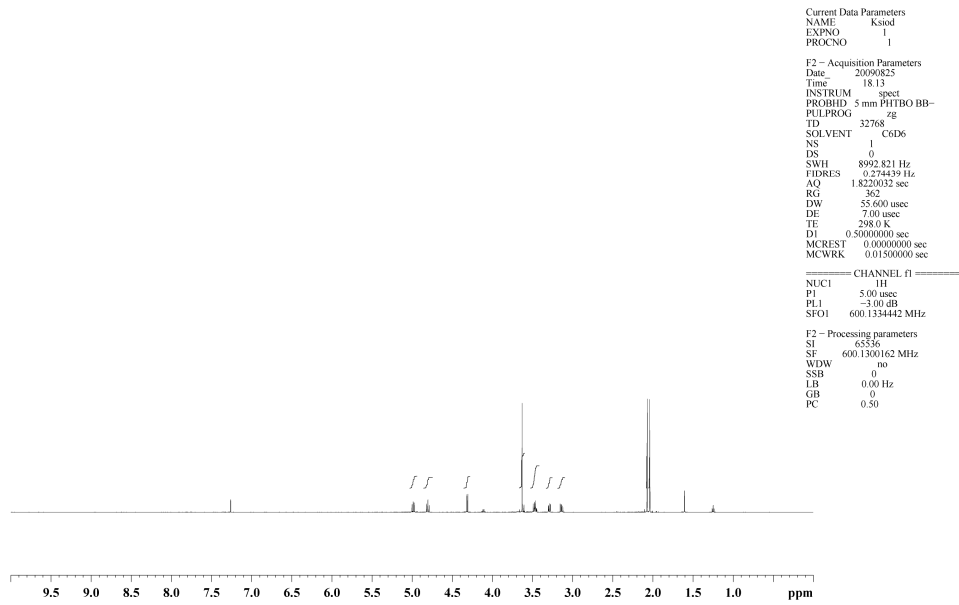

$^1\text{H}$  NMR of **5**.

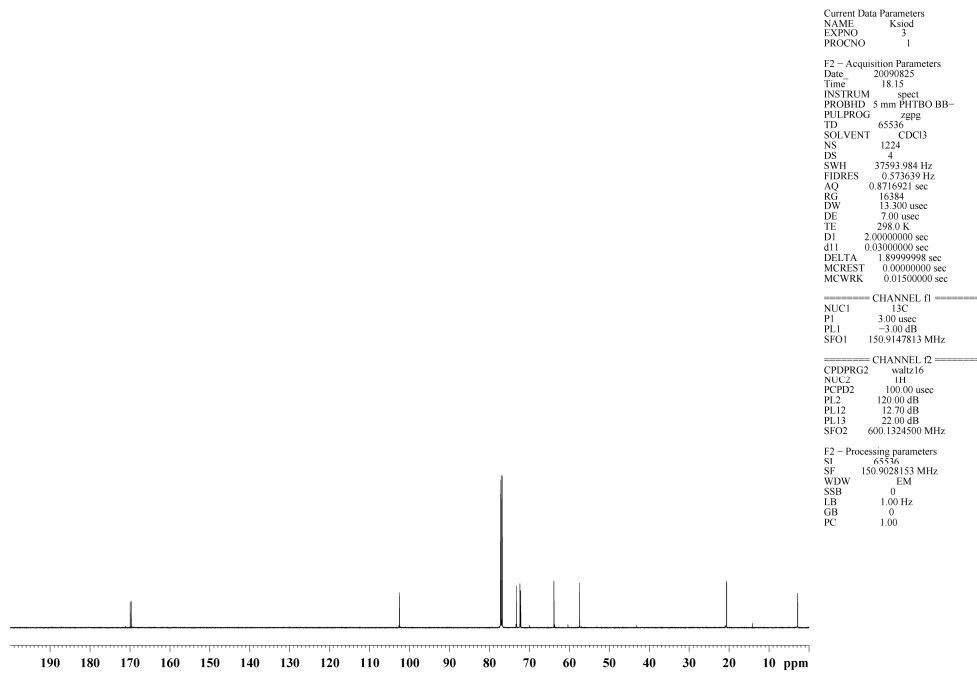

$^{13}\text{C}$  NMR of **5**.

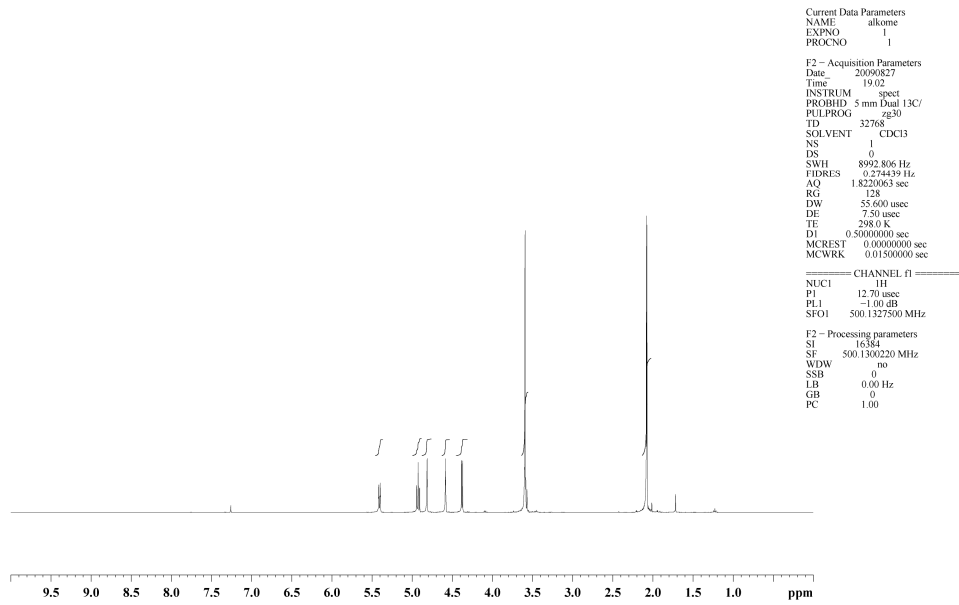

<sup>1</sup>H NMR of 2.

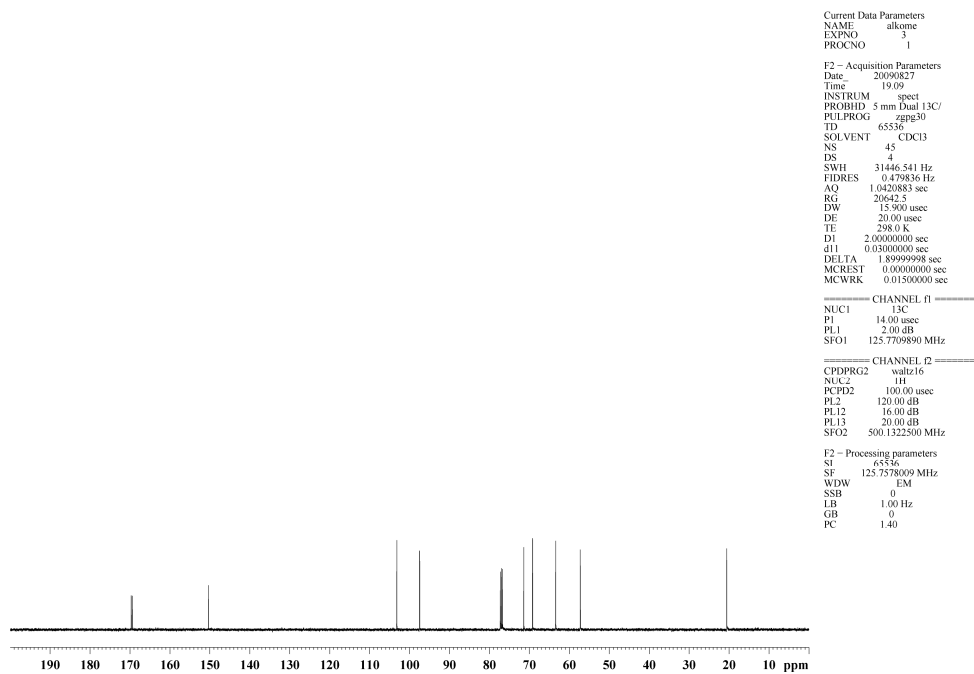

<sup>13</sup>C NMR of 2.

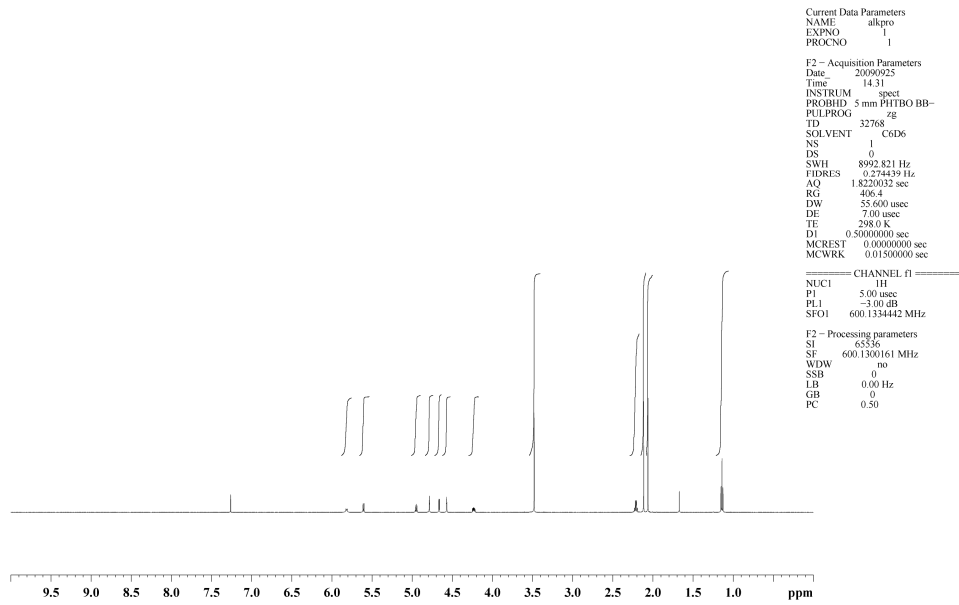

$^1\text{H}$  NMR of **7**.

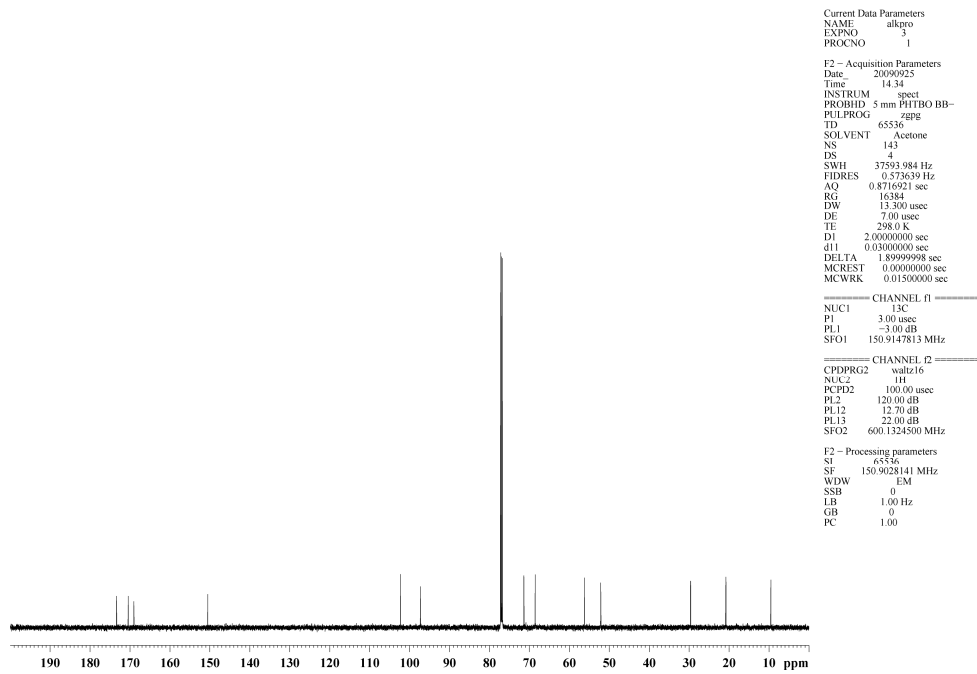

$^{13}\text{C}$  NMR of **7**.

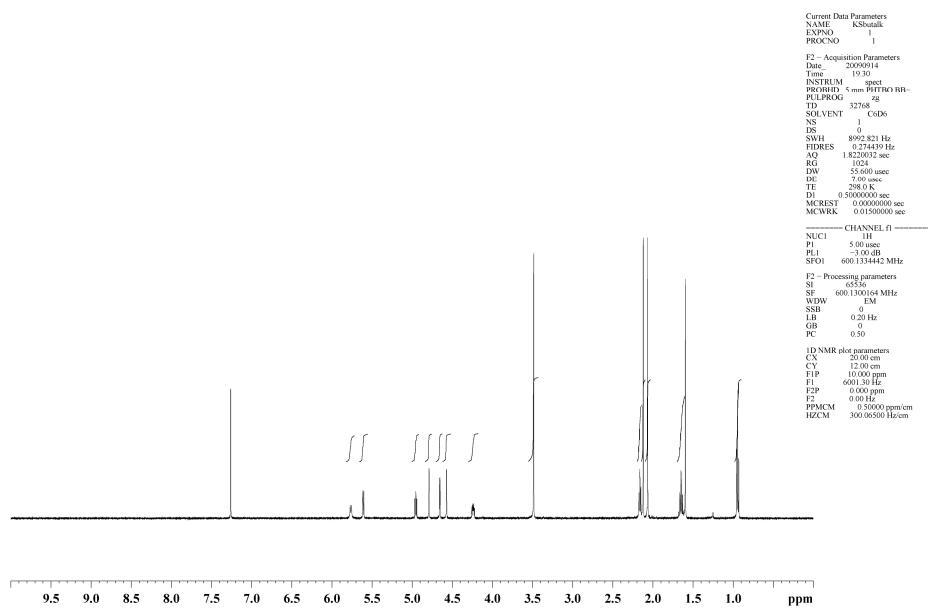

$^1\text{H}$  NMR of **8**.

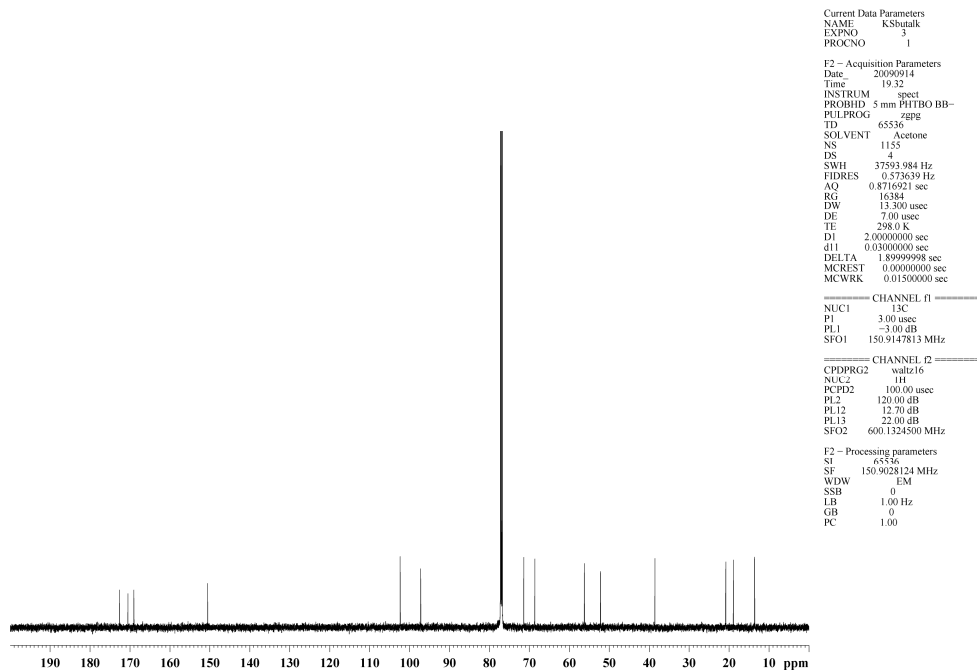

$^{13}\text{C}$  NMR of **8**.

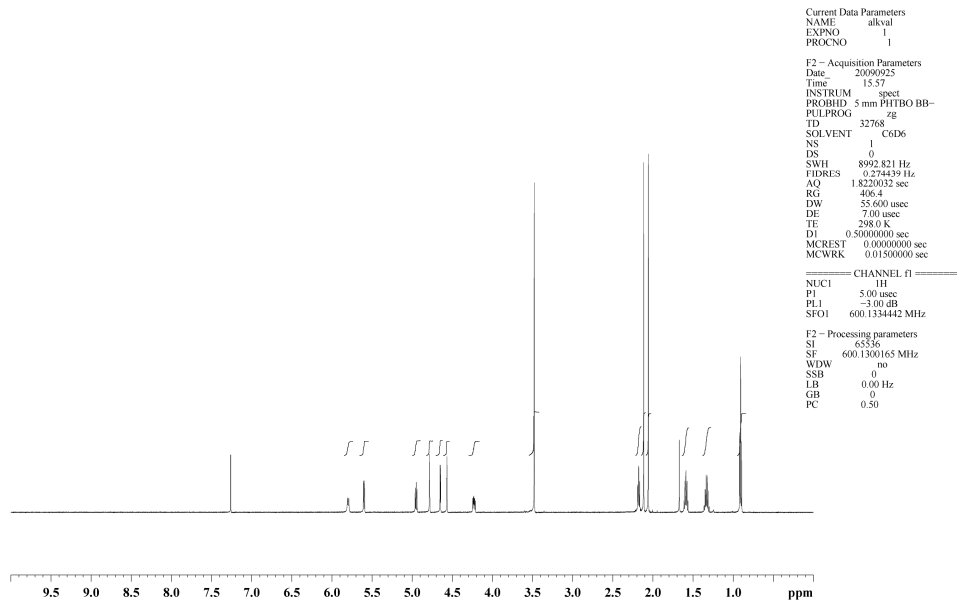

<sup>1</sup>H NMR of **9**.

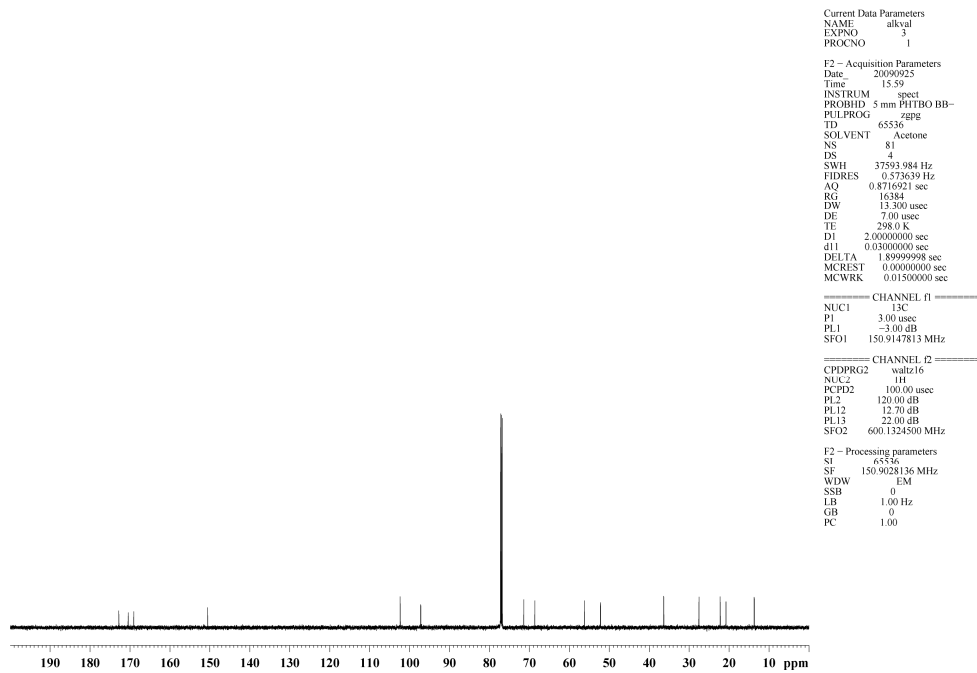

<sup>13</sup>C NMR of **9**.

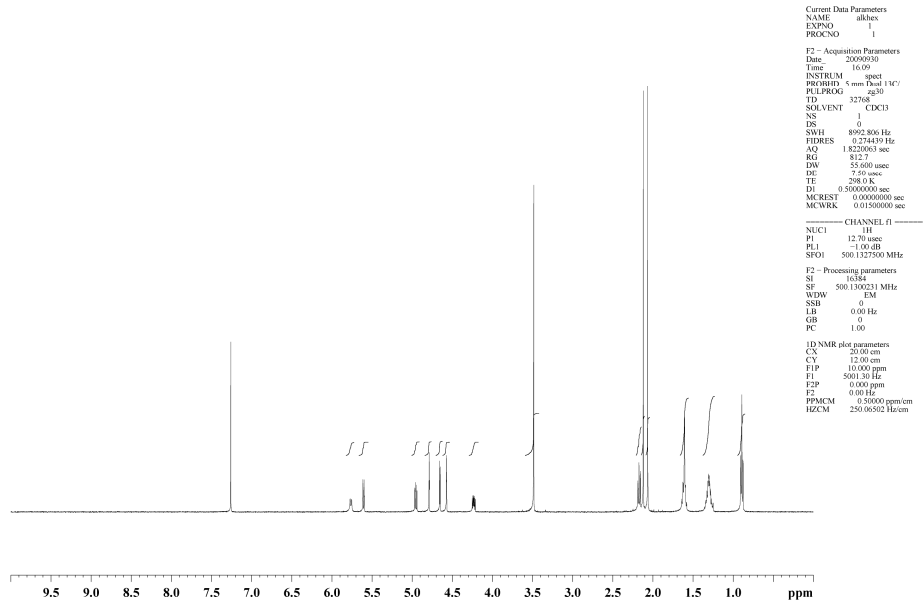

<sup>1</sup>H NMR of 10.

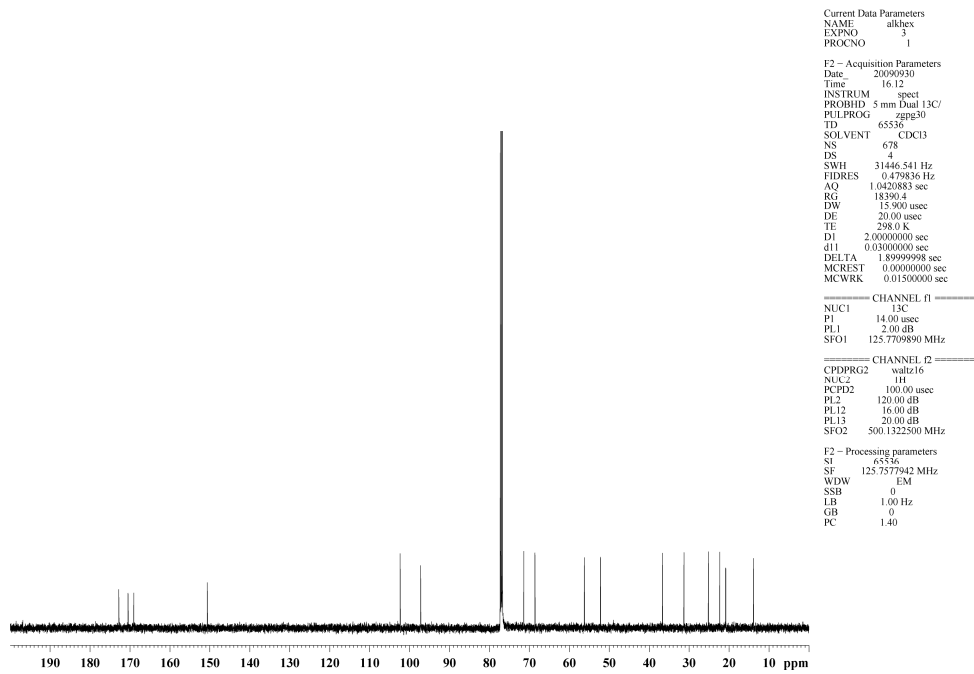

<sup>13</sup>C NMR of 10.



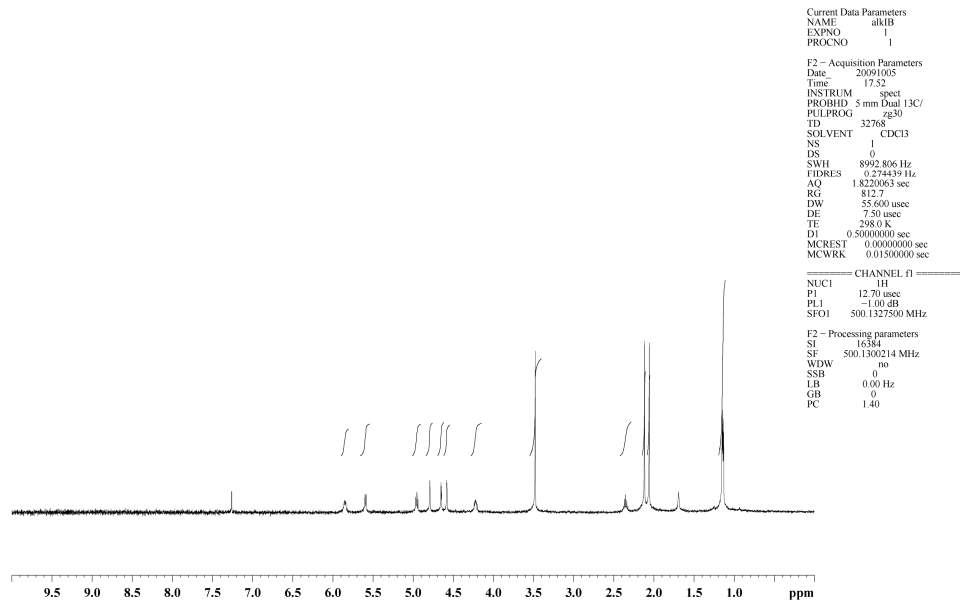

<sup>1</sup>H NMR of **11**.

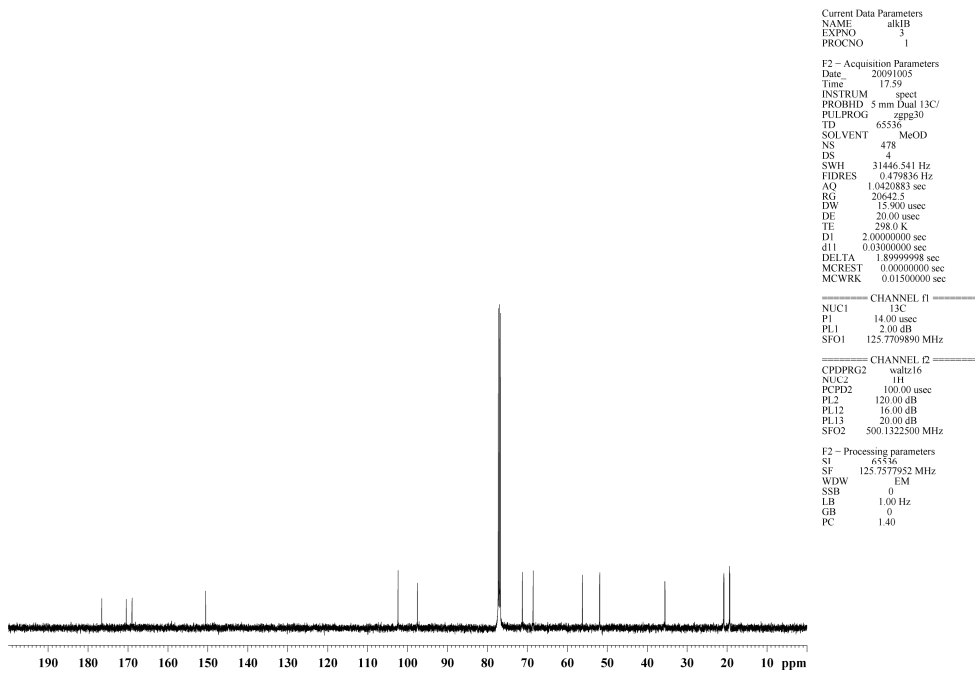

<sup>13</sup>C NMR of **11**.

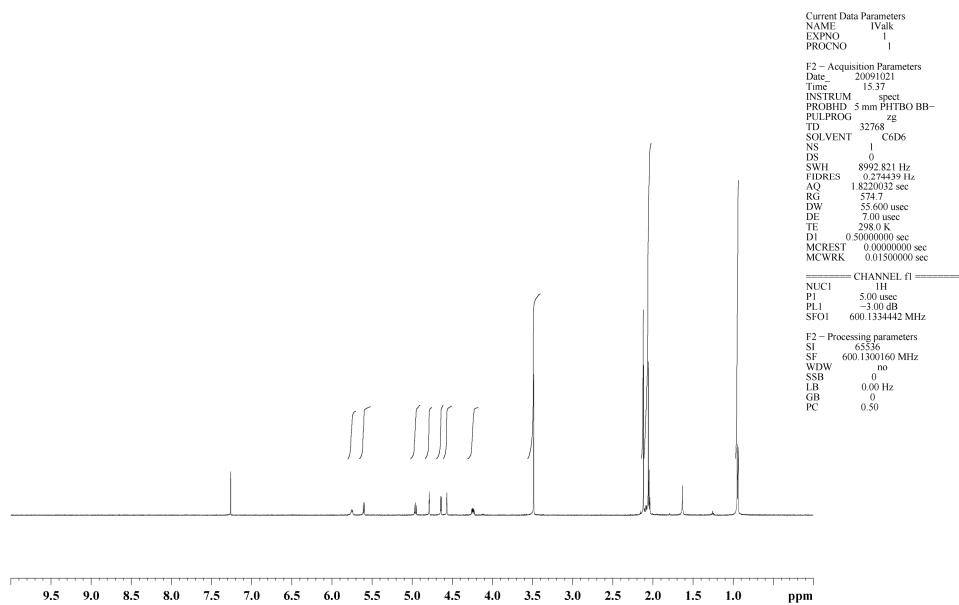

$^1\text{H}$  NMR of **12**.

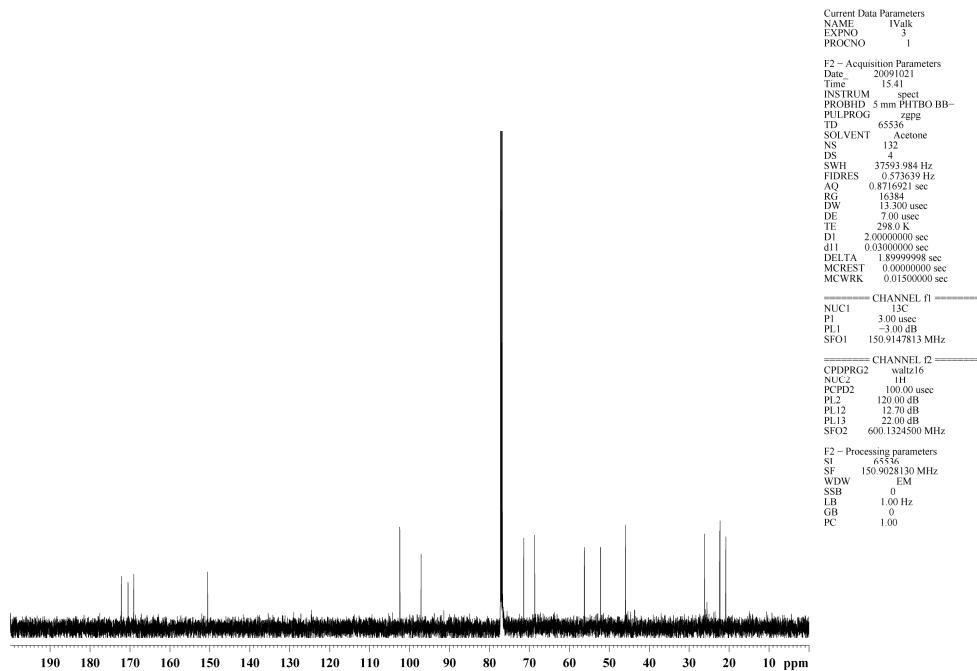

$^{13}\text{C}$  NMR of **12**.

Current Data Parameters  
 NAME pro0bn  
 EXPNO 1  
 PROCNO 1  
 F2 - Acquisition Parameters  
 Date\_ 20091005  
 Time 18.31  
 INSTRUM spect  
 PROBHD 5 mm Dual 13C/  
 PULPROG zg30  
 TD 32768  
 SOLVENT CDCl3  
 NS 1  
 DS 0  
 SWH 892.806 Hz  
 FIDRES 0.274439 Hz  
 AQ 1.822063 sec  
 RG 812.7  
 DW 55.600 usec  
 DE 7.20 usec  
 TE 297.5 K  
 D1 0.5000000 sec  
 MCREST 0.0000000 sec  
 MCWRK 0.01500000 sec

===== CHANNEL f1 =====  
 NUC1 1H  
 P1 12.70 usec  
 PL1 -1.00 dB  
 SFO1 500.1327500 MHz  
 F2 - Processing parameters  
 SI 16384  
 SF 500.1300152 MHz  
 WDW no  
 SSB 0  
 LB 0.00 Hz  
 GB 0  
 PC 1.40

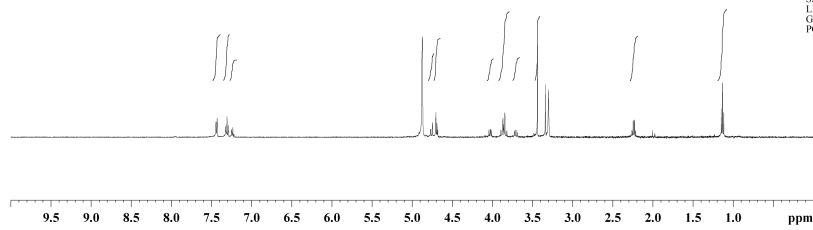

<sup>1</sup>H NMR of 14.

Current Data Parameters  
 NAME pro0bn  
 EXPNO 3  
 PROCNO 1  
 F2 - Acquisition Parameters  
 Date\_ 20091005  
 Time 18.37  
 INSTRUM spect  
 PROBHD 5 mm Dual 13C/  
 PULPROG zgpg30  
 TD 65536  
 SOLVENT MeOD  
 NS 1022  
 DS 4  
 SWH 31446.541 Hz  
 FIDRES 0.479836 Hz  
 AQ 1.0420883 sec  
 RG 20642.5  
 DW 15.900 usec  
 DE 20.00 usec  
 TE 298.0 K  
 D1 2.0000000 sec  
 d11 0.03000000 sec  
 DELTA 1.89999998 sec  
 MCREST 0.0000000 sec  
 MCWRK 0.01500000 sec

===== CHANNEL f1 =====  
 NUC1 13C  
 P1 14.00 usec  
 PL1 2.00 dB  
 SFO1 125.7709890 MHz  
 ===== CHANNEL f2 =====  
 CPDPRG2 waltz16  
 NUC2 1H  
 PCPD2 100.00 usec  
 PL2 120.00 dB  
 PL12 16.00 dB  
 PL13 20.00 dB  
 SFO2 500.1322500 MHz

F2 - Processing parameters  
 SI 65536  
 SF 125.7576135 MHz  
 WDW EM  
 SSB 0  
 LB 1.00 Hz  
 GB 0  
 PC 1.40

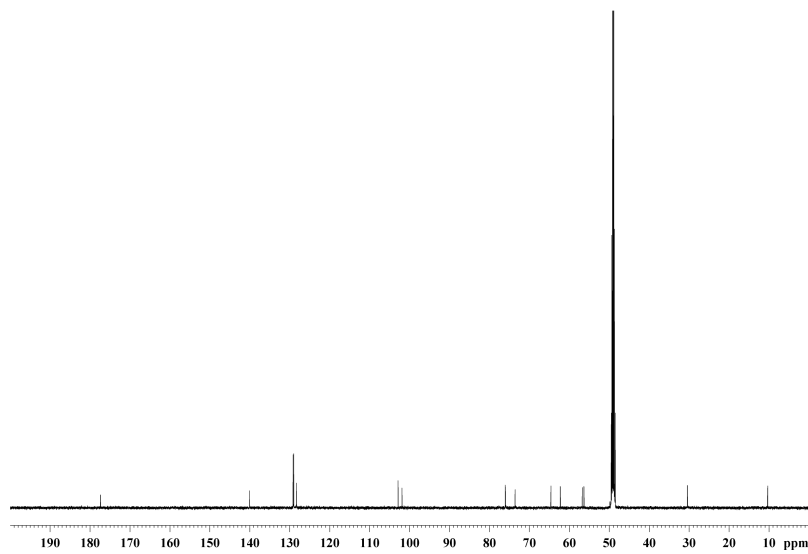

<sup>13</sup>C NMR of 14.

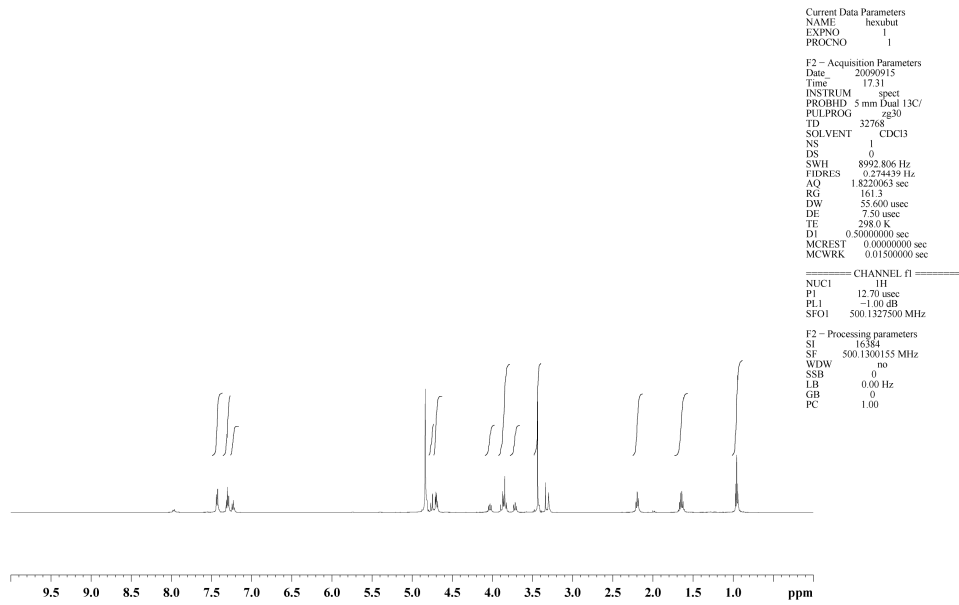

$^1\text{H}$  NMR of **15**.

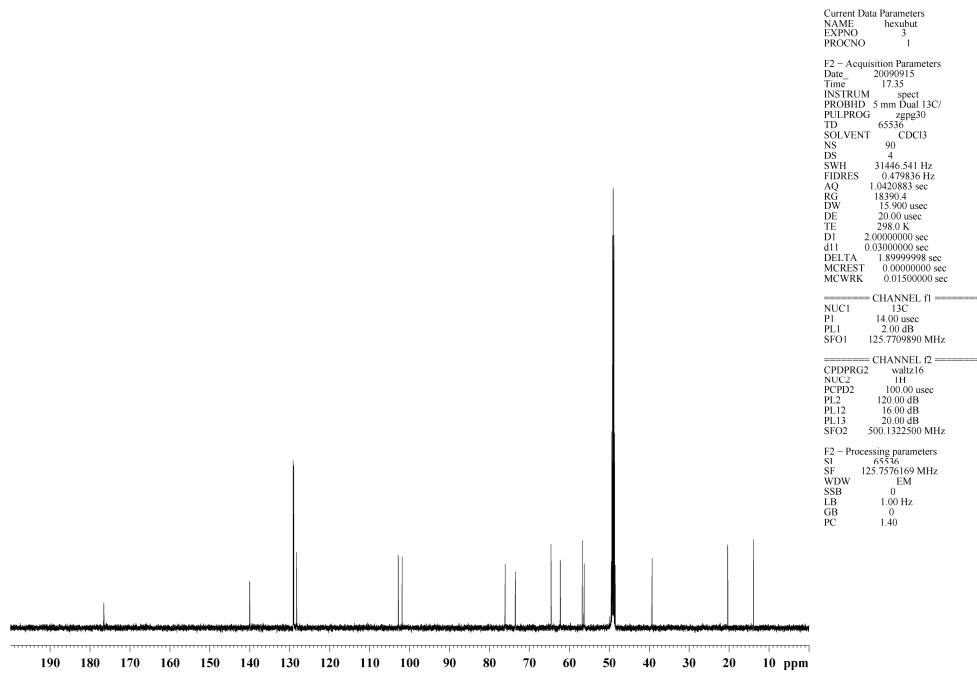

$^{13}\text{C}$  NMR of **15**.

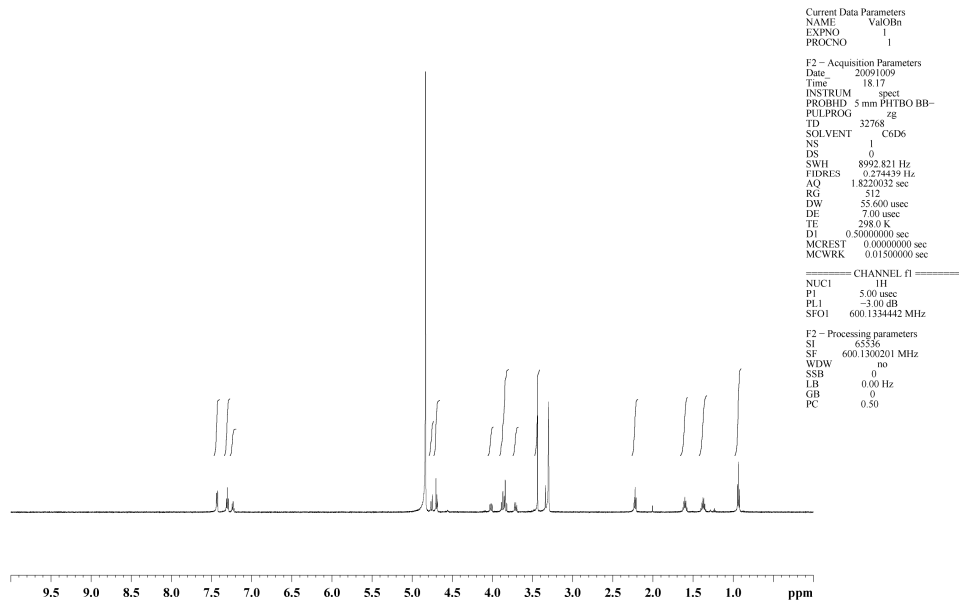

$^1\text{H}$  NMR of 16.

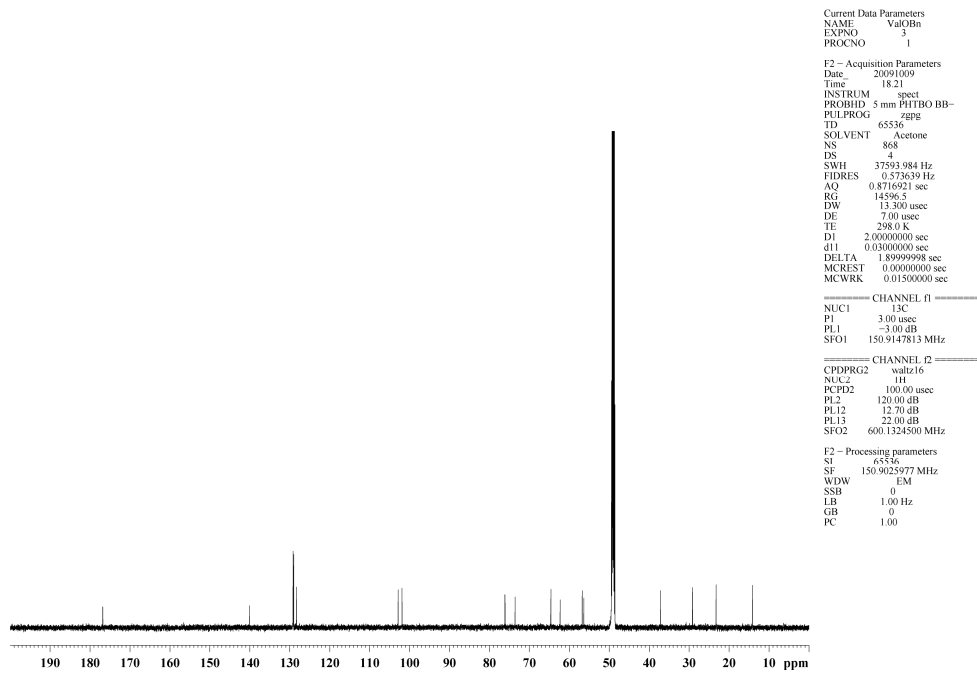

$^{13}\text{C}$  NMR of 16.

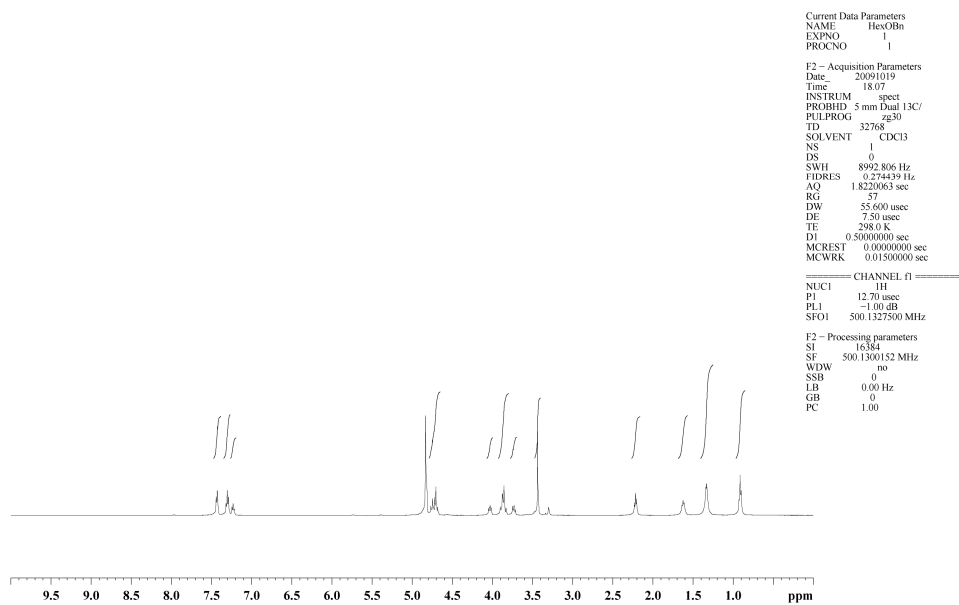

<sup>1</sup>H NMR of 17.

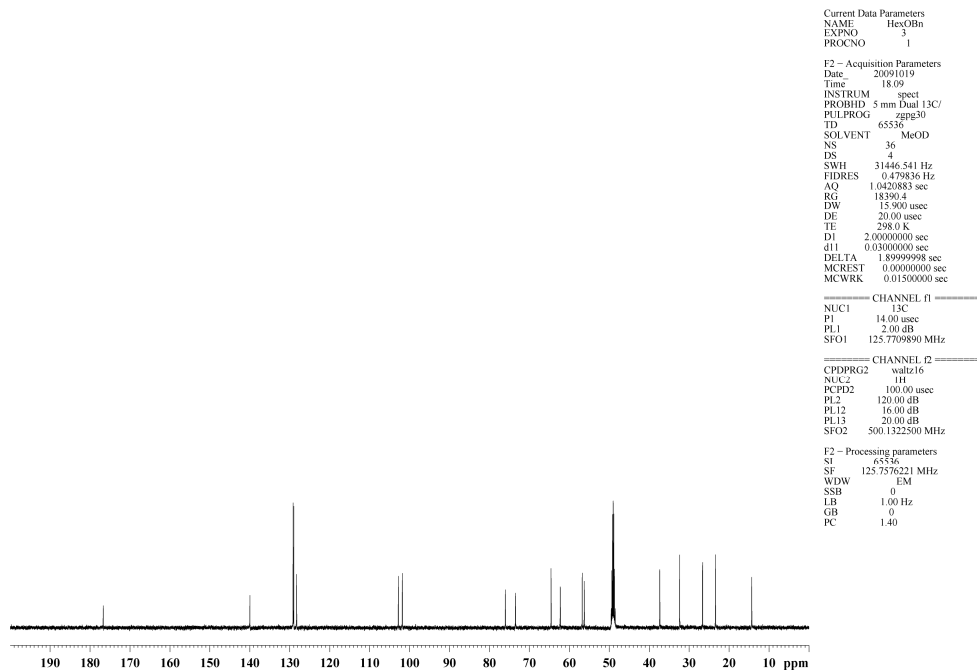

<sup>13</sup>C NMR of 17.

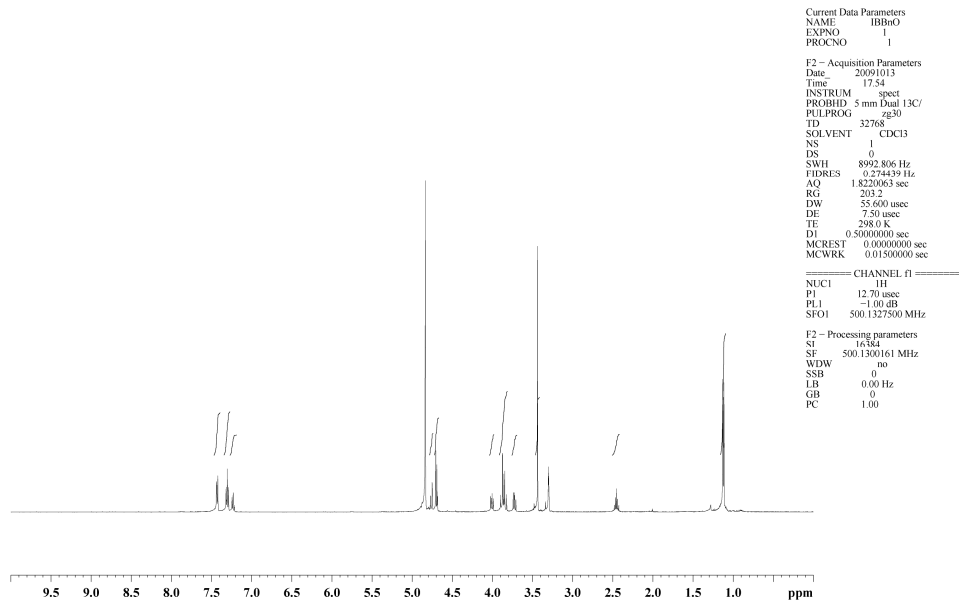

$^1\text{H}$  NMR of **18**.

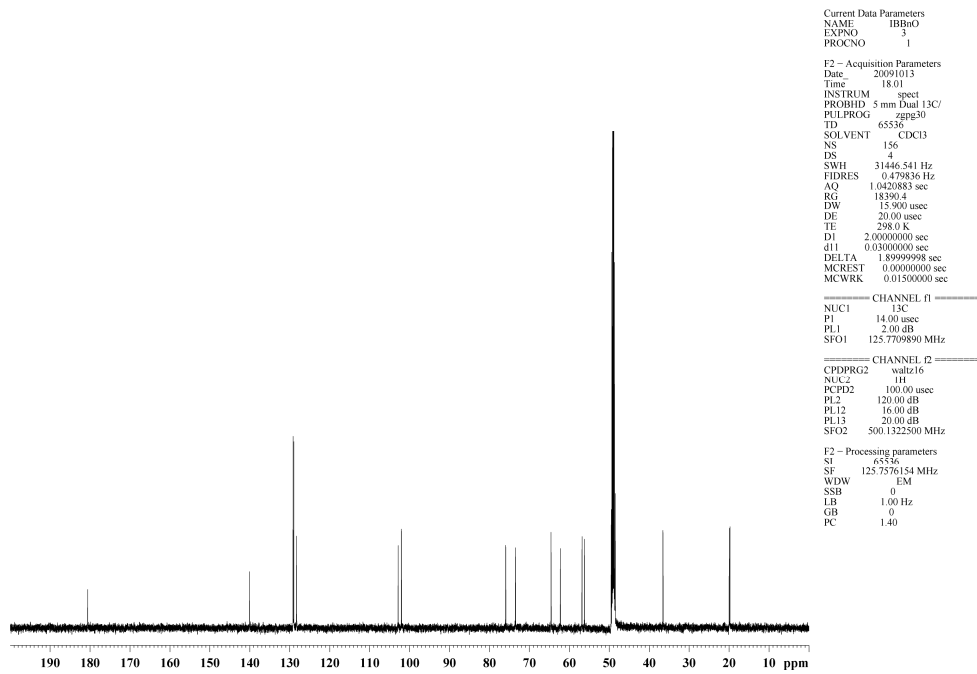

$^{13}\text{C}$  NMR of **18**.

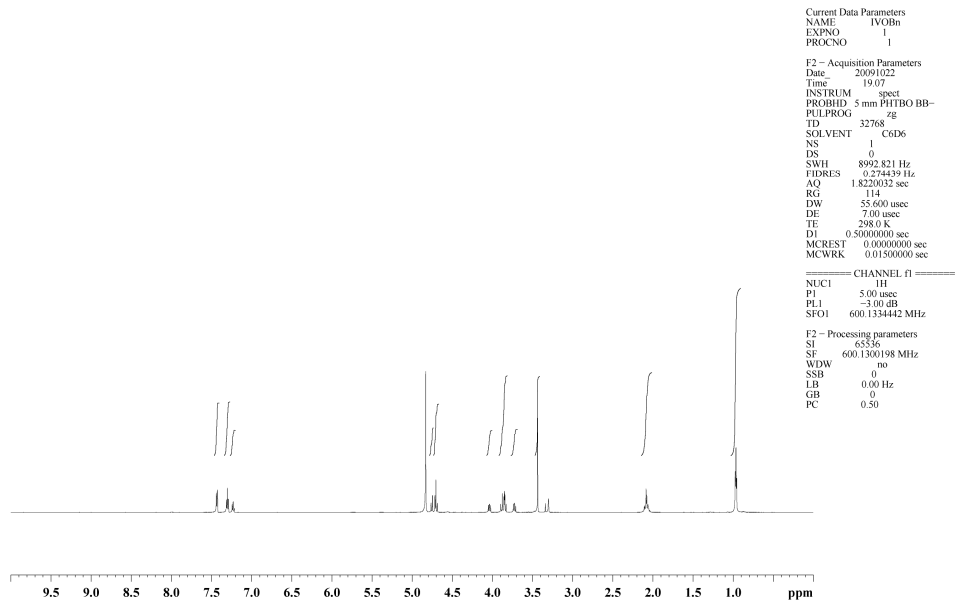

$^1\text{H}$  NMR of **19**.

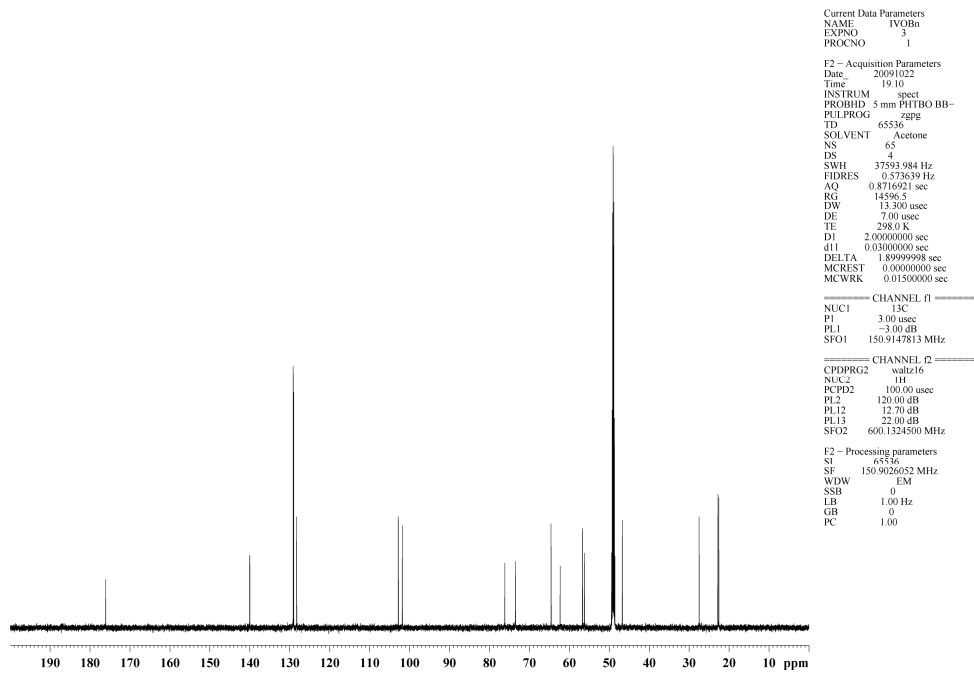

$^{13}\text{C}$  NMR of **19**.



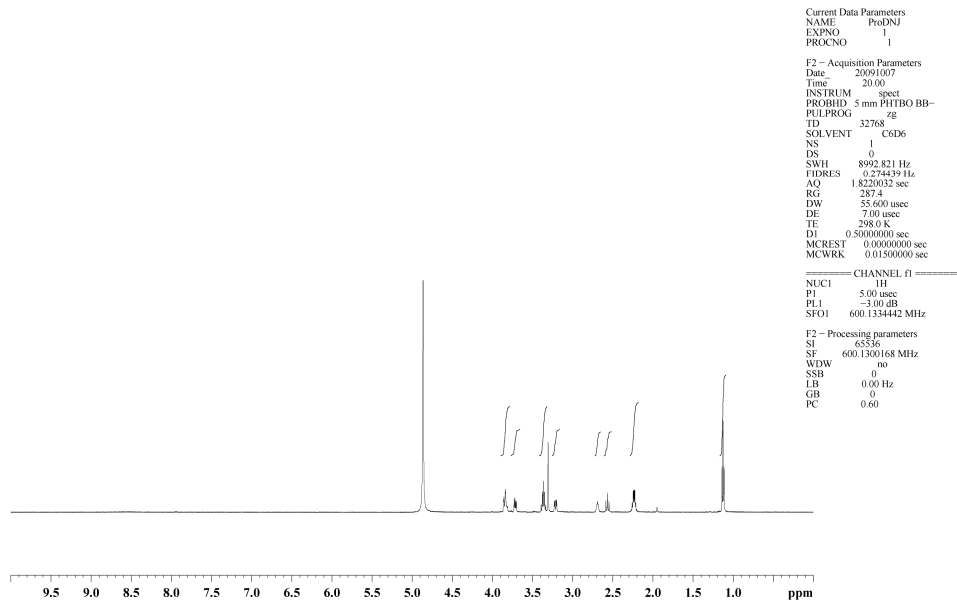

$^1\text{H}$  NMR of **20**.

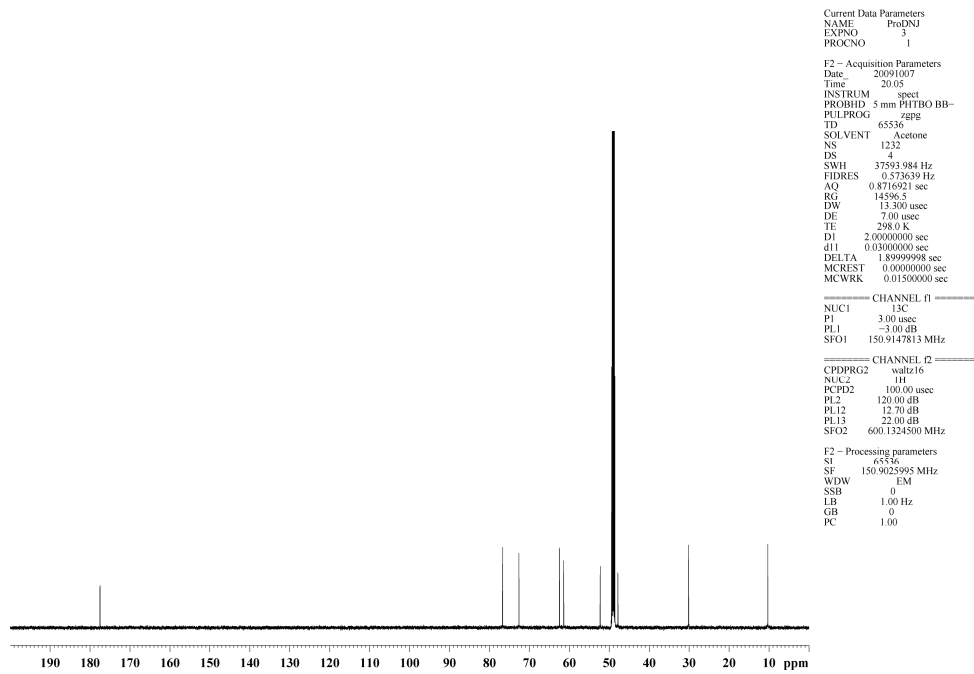

$^{13}\text{C}$  NMR of **20**.

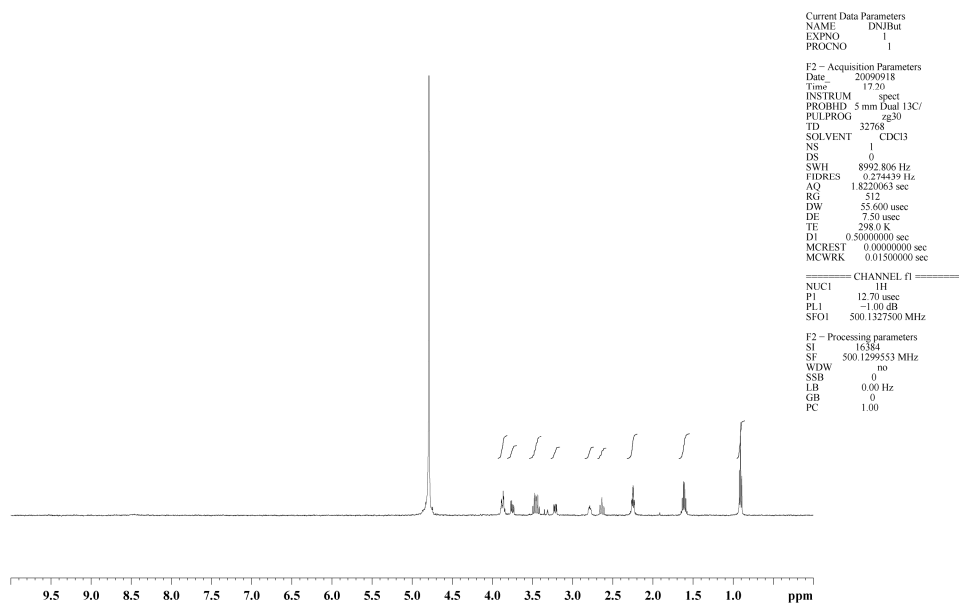

$^1\text{H}$  NMR of **21**.

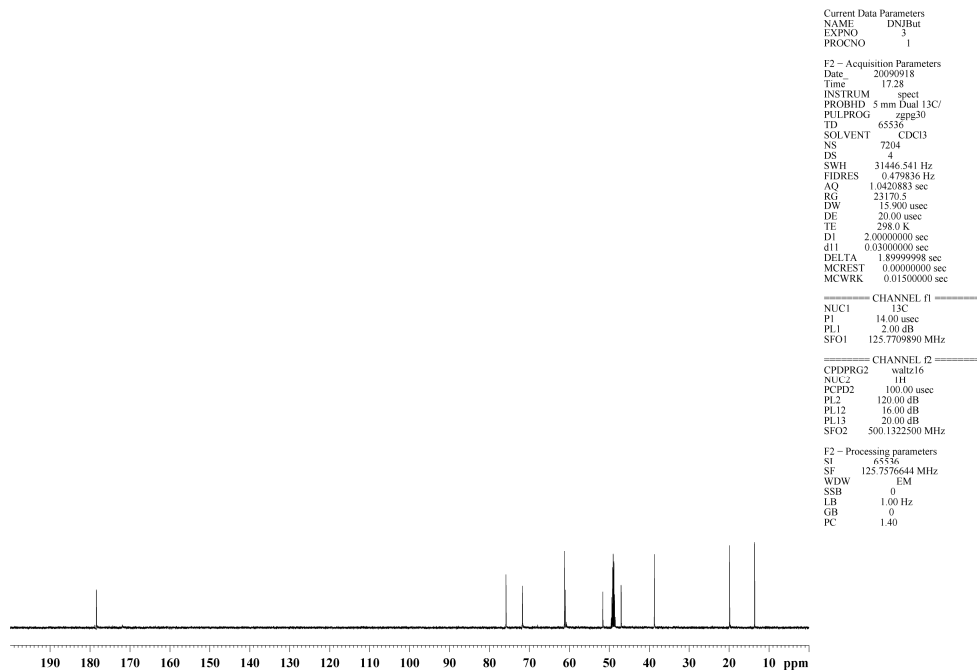

$^{13}\text{C}$  NMR of **21**.

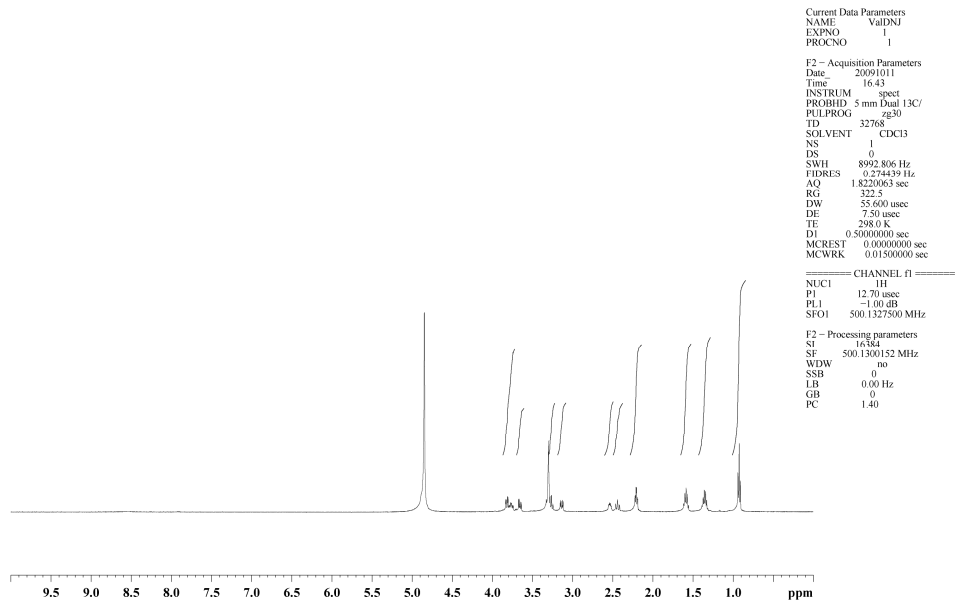

$^1\text{H}$  NMR of **22**.

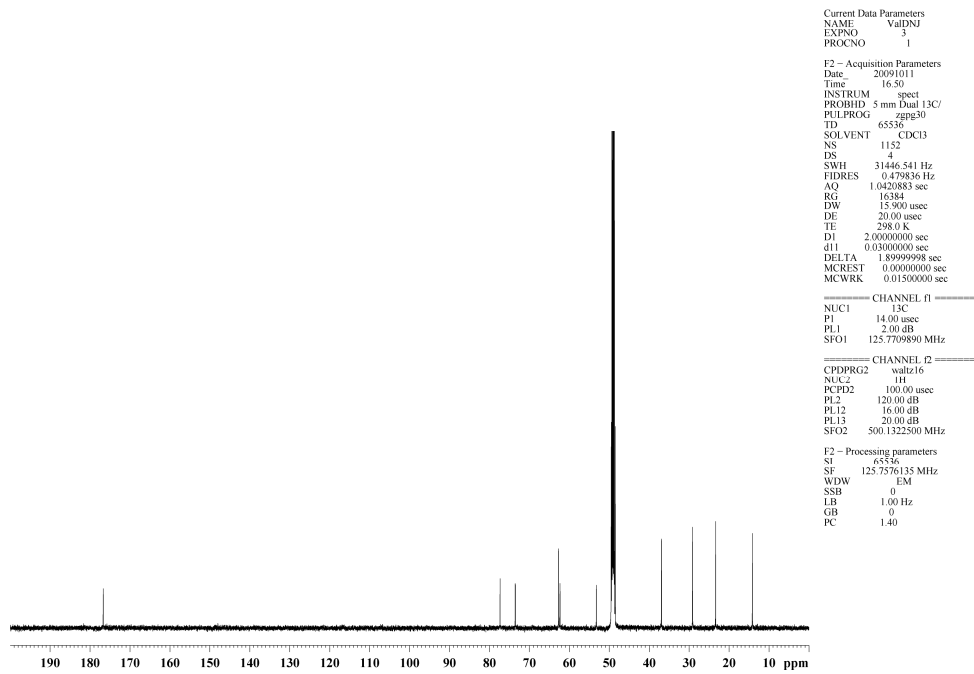

$^{13}\text{C}$  NMR of **22**.

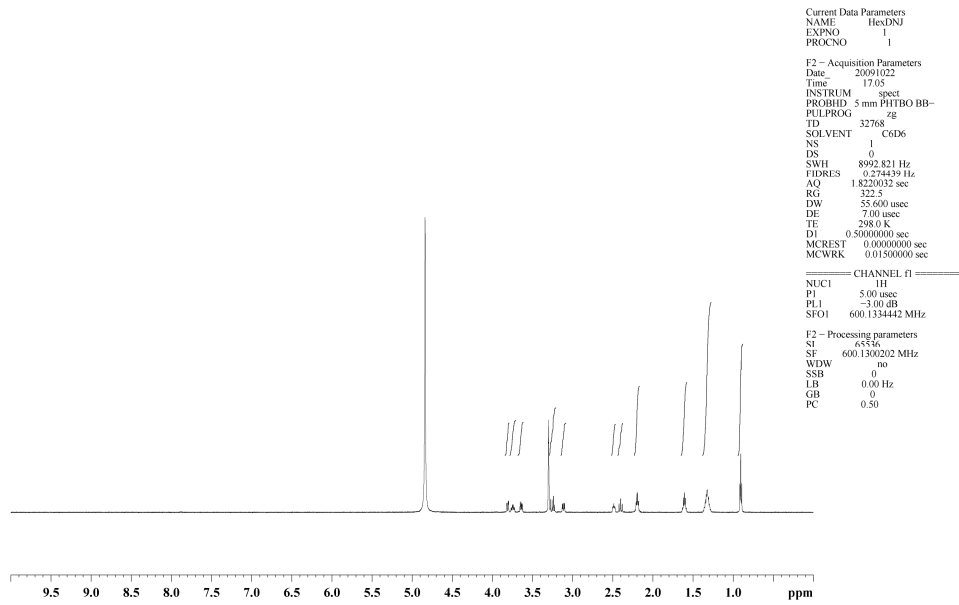

$^1\text{H}$  NMR of **23**.

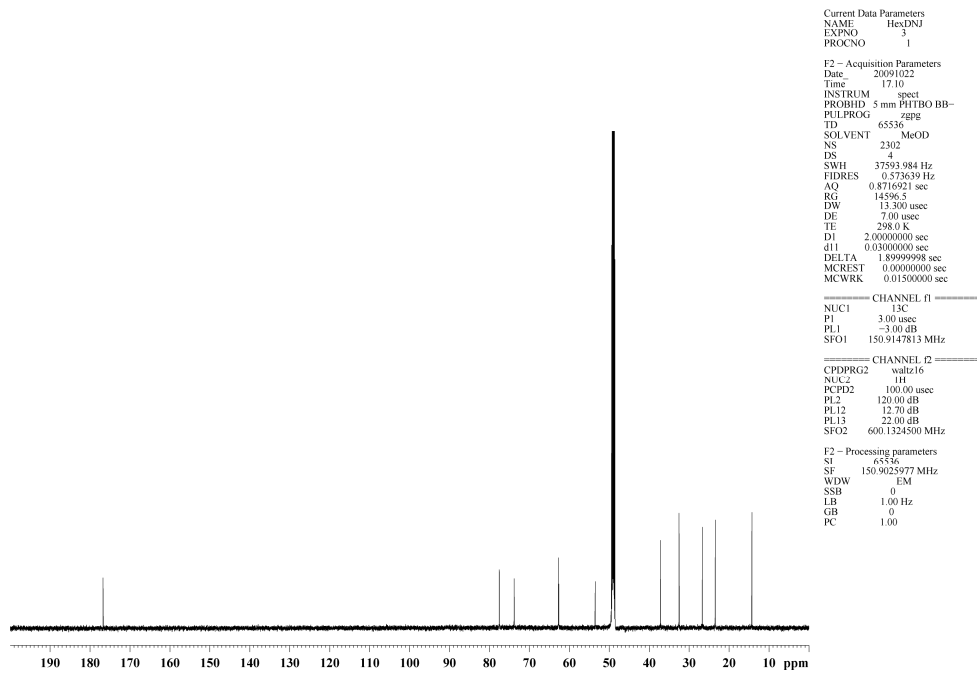

$^{13}\text{C}$  NMR of **23**.

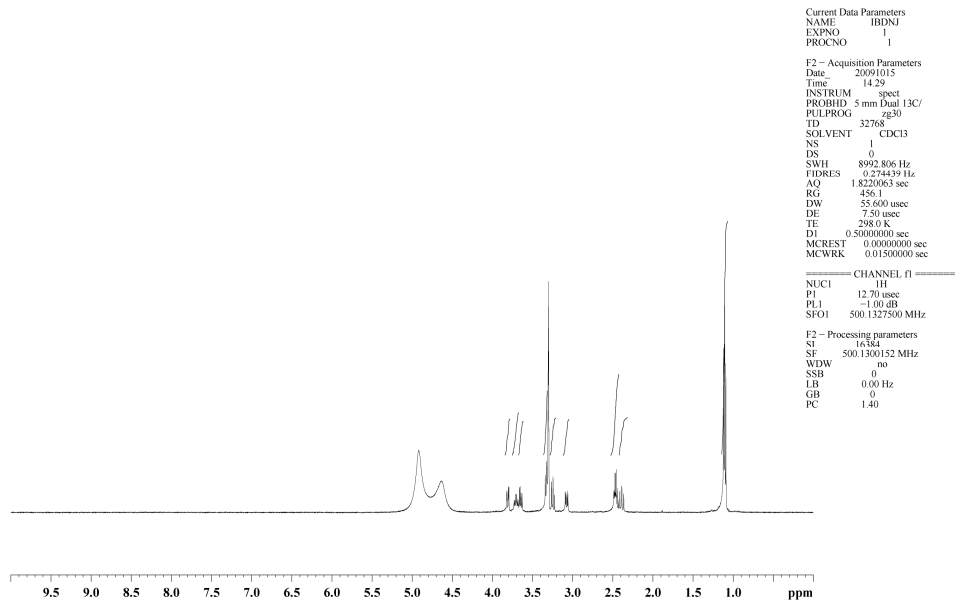

<sup>1</sup>H NMR of 24.

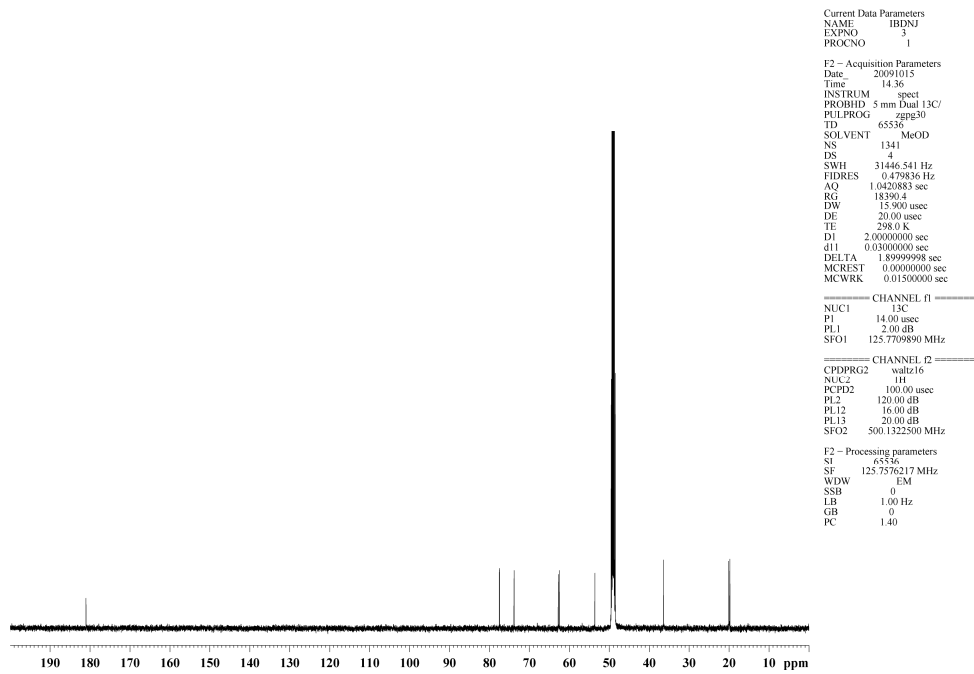

<sup>13</sup>C NMR of 24.

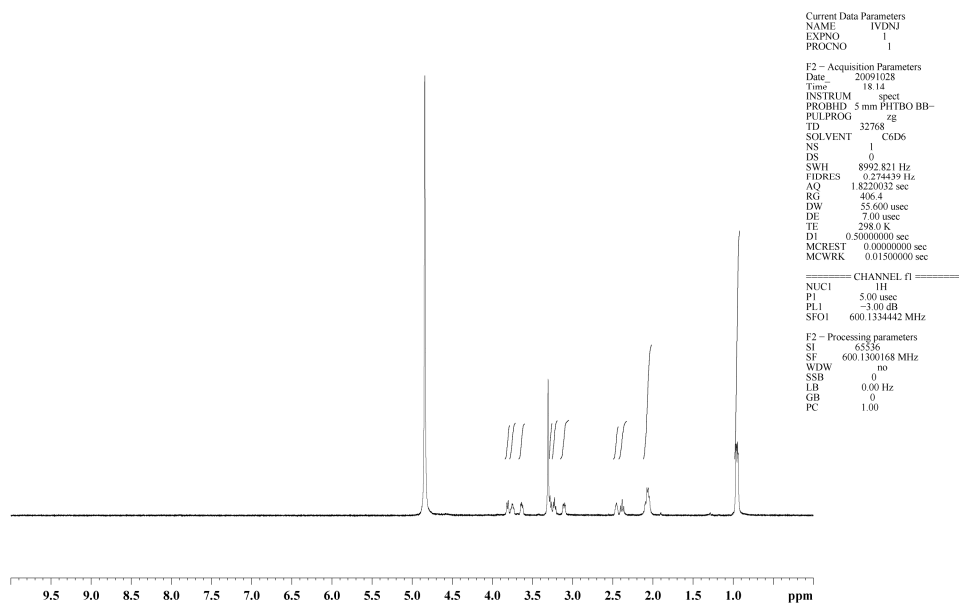

$^1\text{H}$  NMR of **25**.

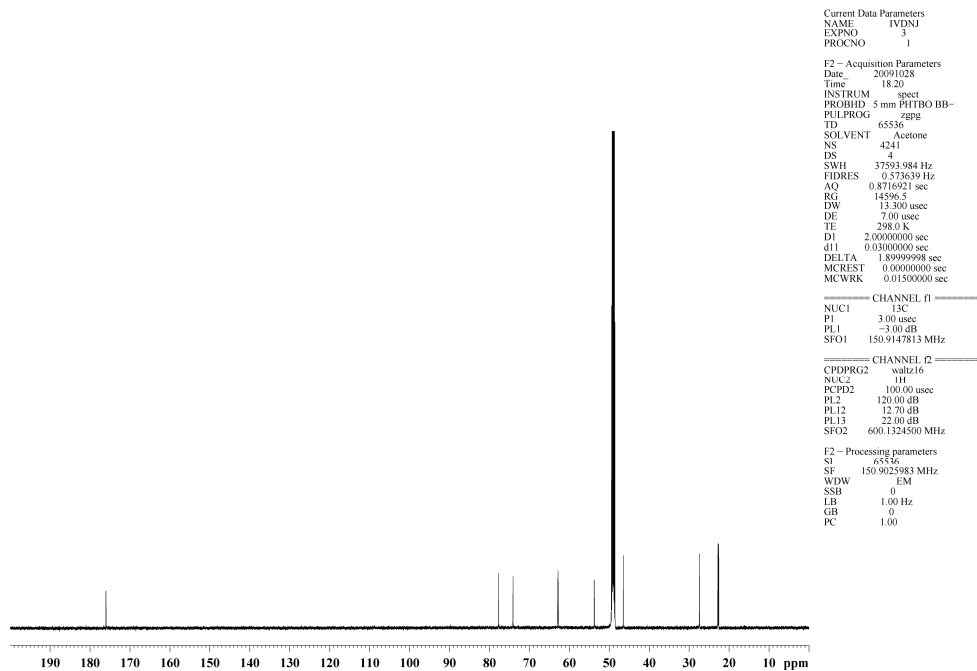

$^{13}\text{C}$  NMR of **25**.
